# Supplementary material
Source: PubMed Central journal article supplement (PMC8078066)

## Supplementary Data

### FIGURE

Sample Table of Predictive Probability Values (PPV) for a Learner

| Subcompetency | Threshold   | Yr1, Mid-Year | Yr1, Year-End | Yr2, Mid-Year | Yr2, Year-End | Yr3, Mid-Year | Yr3, Year-End | Yr4, Mid-Year |
|---------------|-------------|---------------|---------------|---------------|---------------|---------------|---------------|---------------|
| PC01          | ≤ Level 5.0 |               |               |               |               |               |               |               |
|               | ≤ Level 4.5 |               |               |               |               |               |               |               |
|               | ≤ Level 4.0 |               |               |               |               |               |               | 4.5           |
|               | ≤ Level 3.5 |               |               |               |               |               |               | 9.2           |
|               | ≤ Level 3.0 |               |               |               |               | 4.8           | 7.5           | 42.8          |
|               | ≤ Level 2.5 |               |               |               | 4.6           | 9.0           | 27.5          | 63.6          |
|               | ≤ Level 2.0 |               |               | 4.8           | 5.9           | 28.1          | 46.0          |               |
|               | ≤ Level 1.5 |               |               | 5.7           | 24.8          |               |               |               |
|               | ≤ Level 1.0 | 4.3           | 4.3           | 21.4          | 49.4          |               |               |               |
|               | PC02        | ≤ Level 5.0   |               |               |               |               |               |               |
| ≤ Level 4.5   |             |               |               |               |               |               |               |               |
| ≤ Level 4.0   |             |               |               |               |               |               |               |               |
| ≤ Level 3.5   |             |               |               |               | 5.2           |               |               | 12.4          |
| ≤ Level 3.0   |             |               |               |               | 5.3           | 6.0           | 9.8           | 46.7          |
| ≤ Level 2.5   |             |               |               |               | 5.9           | 11.4          | 34.6          | 65.6          |
| ≤ Level 2.0   |             |               |               | 5.8           | 7.8           | 36.3          | 50.8          |               |
| ≤ Level 1.5   |             |               |               | 7.8           | 29.3          | 69.3          |               |               |
| ≤ Level 1.0   |             | 5.5           | 5.7           | 21.4          | 74.2          |               |               |               |

Predictive probability values (PPVs) are estimates that Milestone ratings will fall below Level 4 (the recommended graduation target) by time of graduation, based on national longitudinal milestone ratings. The above table highlights PPVs listed in columns that correspond to each six-month milestone reporting period. The values within the table (PPVs) indicate the percent probability that a learner rated at a certain level with not reach Level 4 in that subcompetency by graduation. For example, in the PC01 subcompetency above, if a learner is rated at a Level of 2.0 in the middle of the 3rd post-graduate year, the value of 28.0 indicates a 28% probability that the resident will not achieve Level 4 in this subcompetency by the time of graduation.

### Additional Resources

1. Accreditation Council for Graduate Medical Education. Milestones National Report 2019. <https://www.acgme.org/Portals/0/PDFs/Milestones/2019MilestonesNationalReportFinal.pdf?ver=2019-09-30-110837-587>. Accessed April 5, 2021.
2. Accreditation Council for Graduate Medical Education. Clinical Competency Committees: A Guidebook for Programs. <https://www.acgme.org/Portals/0/ACGMEClinicalCompetencyCommitteeGuidebook.pdf>. Accessed April 5, 2021.

## Program Milestones Distribution by Subcompetency and PGY Year

### Cardiovascular Medicine End of Year Milestones

Vertical Axis – Number of residents assigned the milestone level  
 Horizontal Axis - Milestone level assigned

**PC-1**

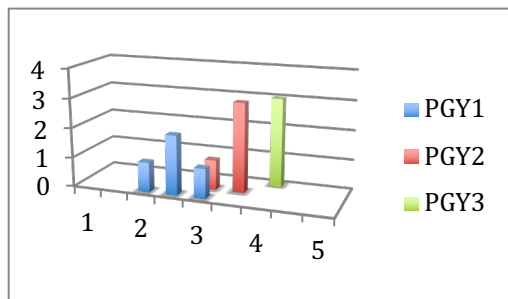

**PC-2**

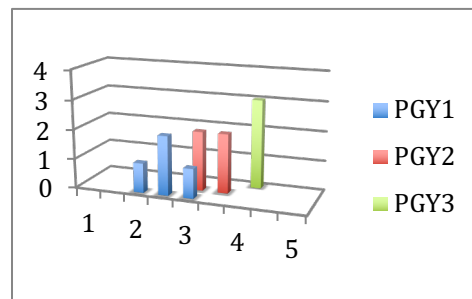

**PC-3**

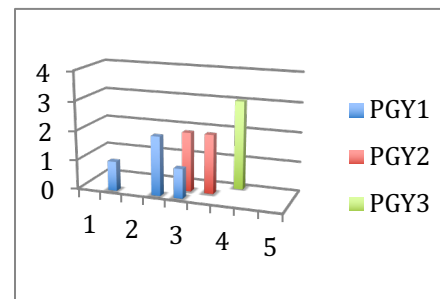

**PC-4**

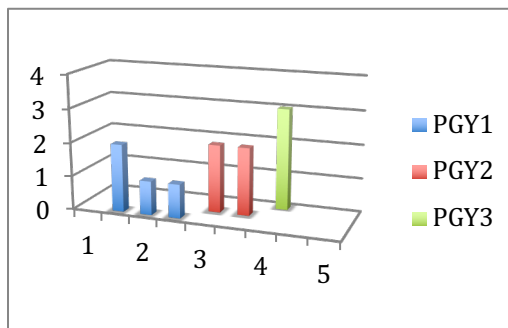

**PC-5**

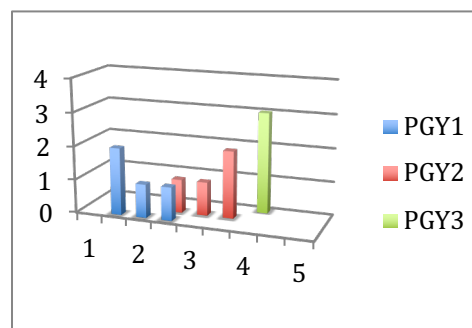

**PC-6**

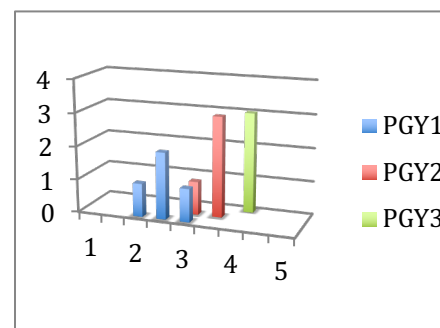

**MK-1**

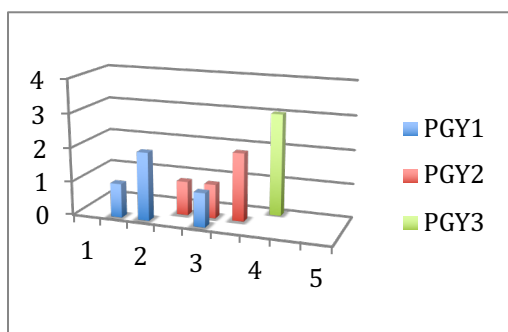

**MK-2**

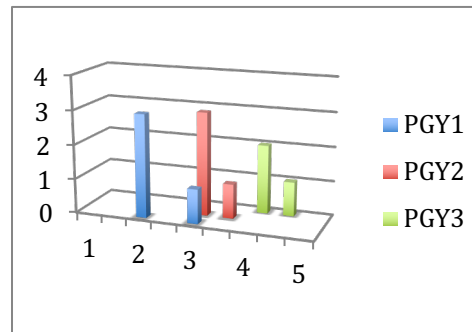

**MK-3**

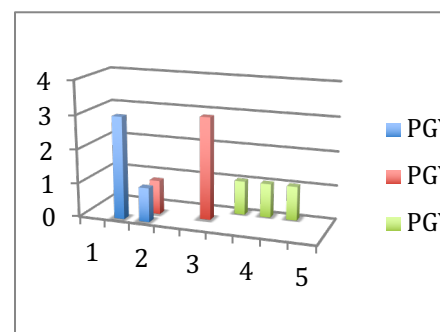



**PR-2**

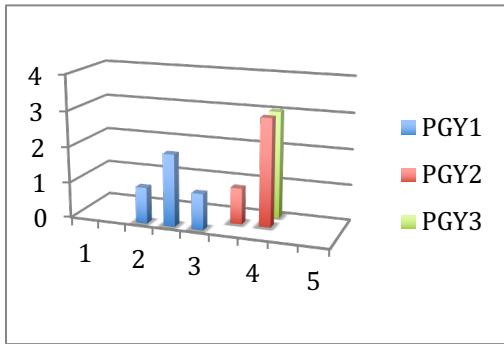

**PR-3**

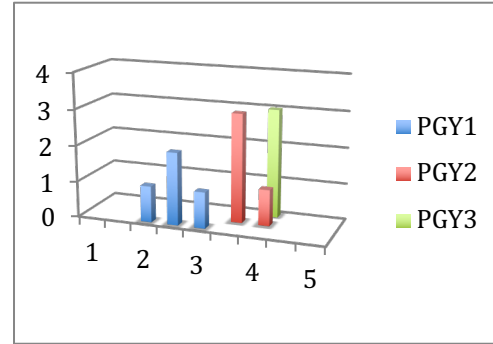

**PR-4**

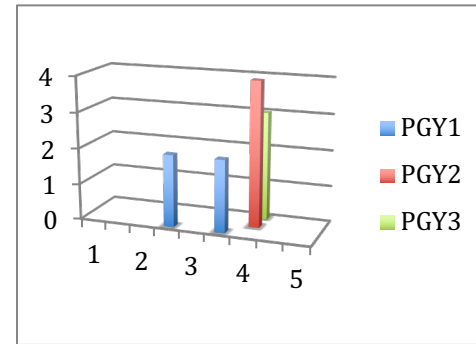

**ICS-1**

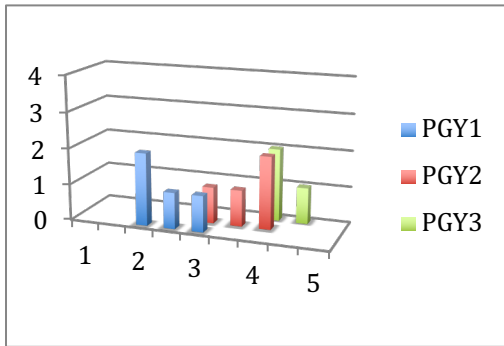

**ICS-2**

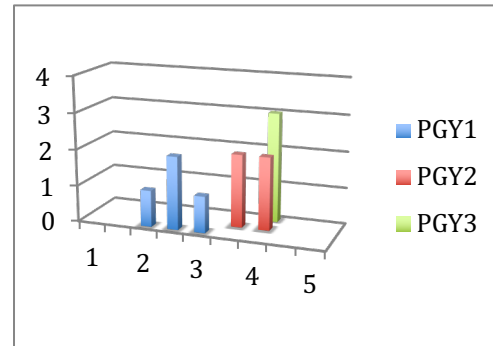

**ICS-3**

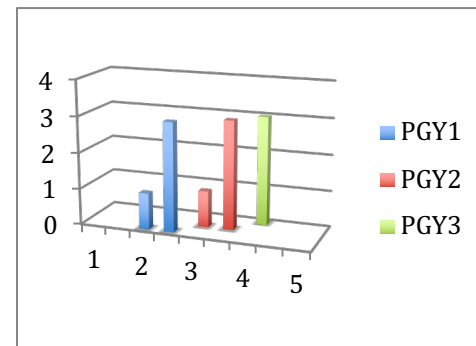

## One-Year Program Milestones Mid- and End-of-Year Distribution by Subcompetency

### Geriatrics: Mid-Year and End-of-Year Milestones

Vertical Axis - Number of residents assigned the milestone level

Horizontal Axis - Milestone level assigned

Abbreviations: MY, mid-year; EOY, end-of year

#### PC-1

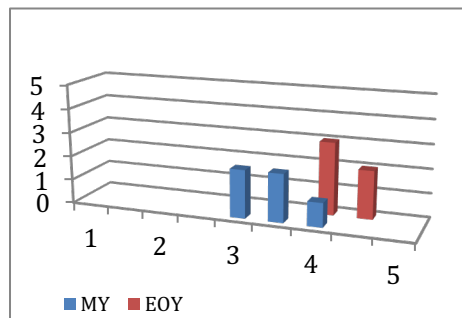

#### PC-2

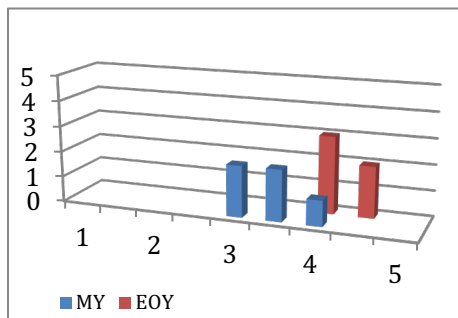

#### PC-3

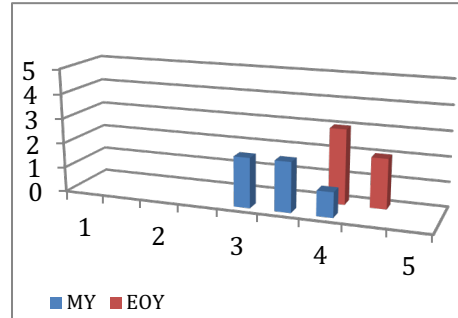

#### PC-5

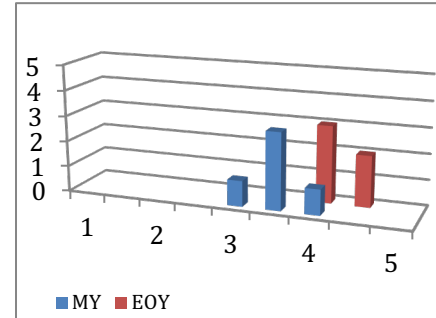

#### PC-6

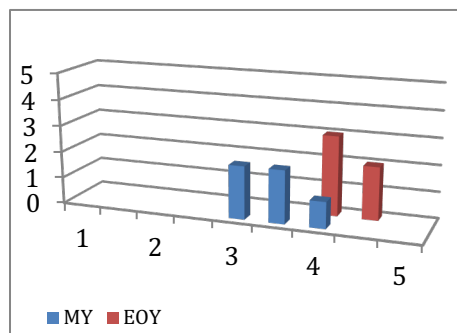

#### MK-1

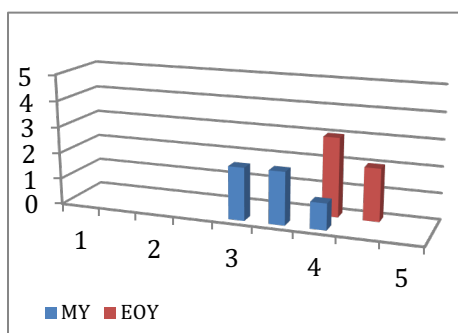

#### MK-2

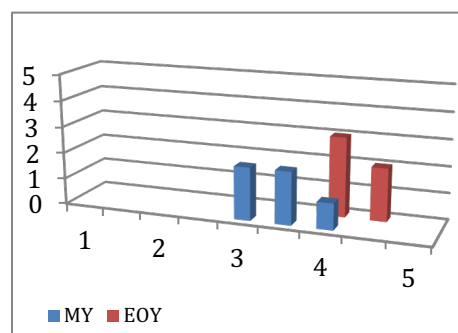

#### MK-3

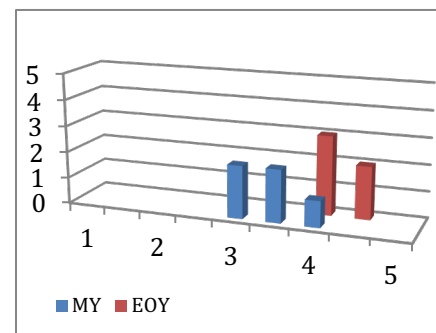



**ICS-1**

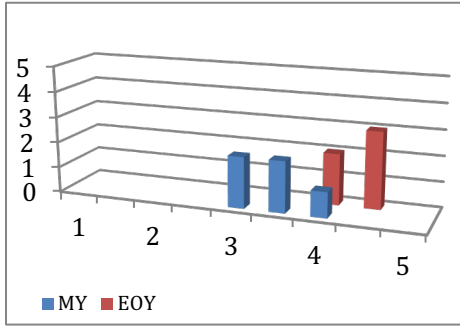

**ICS-2**

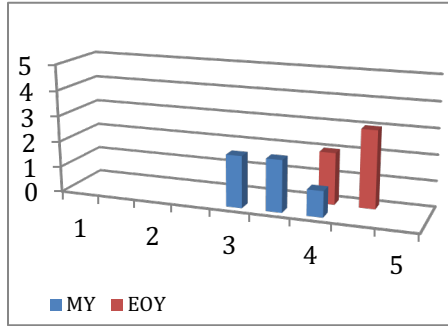

**ICS-3**

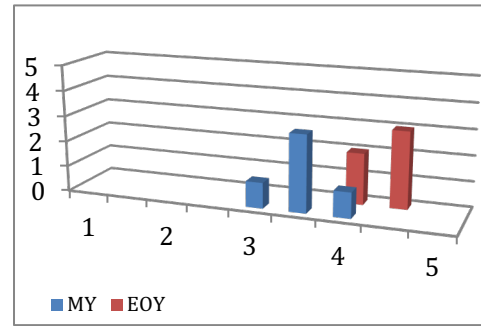

### Creating a Program Milestones Trend Chart

| Subcompetency | Resident Level | Milestone Level Assigned |
|---------------|----------------|--------------------------|
| PC1           | 1              | 1.5                      |
| PC1           | 1              | 2                        |
| PC1           | 1              | 2.5                      |
| PC1           | 2              | 2                        |
| PC1           | 2              | 3                        |
| PC1           | 2              | 3.5                      |
| PC1           | 3              | 4                        |
| PC1           | 3              | 4                        |
| PC1           | 3              | 4.5                      |
|               |                |                          |
| ICS2          | 1              | 2                        |
| ICS2          | 1              | 2                        |
| ICS2          | 1              | 2.5                      |
| ICS2          | 2              | 2.5                      |
| ICS2          | 2              | 3                        |
| ICS2          | 2              | 3.5                      |
| ICS2          | 3              | 3                        |
| ICS2          | 3              | 4                        |
| ICS2          | 3              | 4                        |
|               |                |                          |
| SBP1          | 1              | 2                        |
| SBP1          | 1              | 2.5                      |
| SBP1          | 1              | 2.5                      |
| SBP1          | 2              | 2.5                      |
| SBP1          | 2              | 3                        |
| SBP1          | 2              | 3                        |
| SBP1          | 3              | 3                        |
| SBP1          | 3              | 3                        |
| SBP1          | 3              | 3                        |

1. Pull individual resident milestone levels for each subcompetency from the ACGME data file (or your own data)
2. Create a table with the number of residents at each PGY level assigned each milestone level
3. Create a 3-D Column Chart by highlighting the data in your chart
4. Create axis labels

| PC1  | 1 | 1.5 | 2 | 2.5 | 3 | 3.5 | 4 | 4.5 | 5 |
|------|---|-----|---|-----|---|-----|---|-----|---|
| PGY1 |   | 1   | 1 | 1   |   |     |   |     |   |
| PGY2 |   |     | 1 |     | 1 | 1   |   |     |   |
| PGY3 |   |     |   |     |   |     | 2 | 1   |   |

| ICS2 | 1 | 1.5 | 2 | 2.5 | 3 | 3.5 | 4 | 4.5 | 5 |
|------|---|-----|---|-----|---|-----|---|-----|---|
| PGY1 |   |     | 2 | 1   |   |     |   |     |   |
| PGY2 |   |     |   | 1   | 1 | 1   |   |     |   |
| PGY3 |   |     |   |     | 1 |     | 1 | 1   |   |

| SBP1 | 1 | 1.5 | 2 | 2.5 | 3 | 3.5 | 4 | 4.5 | 5 |
|------|---|-----|---|-----|---|-----|---|-----|---|
| PGY1 |   |     | 1 | 2   |   |     |   |     |   |
| PGY2 |   |     |   | 1   | 2 |     |   |     |   |
| PGY3 |   |     |   |     | 3 |     |   |     |   |

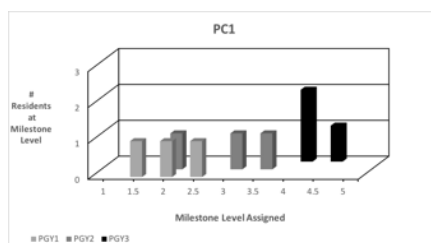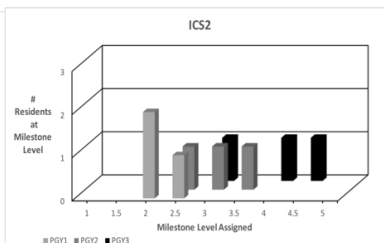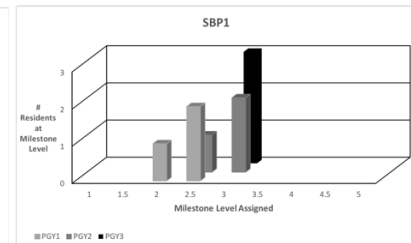

Supplement: JGMED20008491.pdf [file JGMED20008491.pdf]
